# Supplementary material for: Fecal Microbiota Transplantation in Pouchitis: Clinical, Endoscopic, Histologic, and Microbiota Results from a Pilot Study
Source: Springer Nature journal article supplement (doi:10.1007/s10620-019-05715-2), 2019-07-13
Supplement: MOESM2 [file 16926920]

Supplemental Table 1: Detailed Patient Characteristics

|  | Age (years) | Sex | Pouch age (years) | Prior therapies for pouchitis | Prior rifaximin use | Rifaximin given pre-FMT | Steroid use at time of FMT | Biologic use at time of FMT |
| --- | --- | --- | --- | --- | --- | --- | --- | --- |
| Patient 1 | 42 | F | 2 | Amoxicillin clavulanate, ciprofloxacin, budesonide, VSL #3, diphenoxylate/atropine | No | No | Yes (budesonide) | No |
| Patient 2 | 27 | M | 5 | Ciprofloxacin, metronidazole, amoxicillin clavulanate, rifaximin, trimethoprim sulfamethoxazole, budesonide, VSL #3 | Yes | No | No | No |
| Patient 3 | 28 | F | 13 | Metronidazole, psyllium | No | No | No | No |
| Patient 4 | 53 | F | 13 | Rifaximin, ciprofloxacin, probiotic | Yes | No | No | No |
| Patient 5 | 34 | F | 12 | Adalimumab, ciprofloxacin, metronidazole, VSL#3 | No | No | No | Yes (adalimumab) |
| Patient 6 | 32 | F | 3 | Ciprofloxacin, budesonide, dicyclomine | No | No | No | No |
| Patient 7 | 61 | F | 26 | Adalimumab, ciprofloxacin, vancomycin, rifaximin, amoxicillin clavulanate, linaclotide | Yes | No | No | Yes (adalimumab) |
| Patient 8 | 47 | M | 4 | Ciprofloxacin, probiotic, loperamide, bismuth subsalicylate | No | No | No | No |
| Patient 9 | 46 | M | 7 | Ciprofloxacin, metronidazole, rifaximin, tinidazole, nitazoxanide, tetracycline, amoxicillin clavulanate, VSL#3, bismuth subsalicylate, diphenoxylate/atropine, mesalamine enema, probiotic enema | Yes | No | No | No |
| Patient 10 | 56 | F | 26 | Infliximab, adalimumab, vedolizumab, methotrexate, ciprofloxacin, rifaximin, diphenoxylate/atropine, VSL#3 | Yes | No | No | Yes (vedolizumab with methotrexate) |
| Patient 11 | 77 | F | 19 | Metronidazole, ciprofloxacin, rifaximin, probiotics | Yes | No | No | No |
| Patient 12 | 22 | F | 5 | VSL#3 | No | Yes | No | No |
| Patient 13 | 33 | M | 12 | Ciprofloxacin, amoxicillin clavulanate, diphenoxylate/atropine, VSL#3, Align probiotic | No | Yes | No | No |
| Patient 14 | 43 | M | 0 | Ciprofloxacin, metronidazole, amoxicillin clavulanate, loperamide, budesonide, VSL | No | Yes | Yes (budesonide) | No |
| Patient 15 | 48 | F | 6 | Ciprofloxacin, amoxicillin clavulanate, rifaximin, prednisone 5mg | Yes | Yes | Yes (prednisone 5mg/day) | No |
| Patient 16 | 60 | F | 4 | Rifaximin, VSL#3, Align probiotic, loperamide, serum-derived bovine immunoglobulin, peppermint oil capsules | Yes | Yes | No | No |
| Patient 17 | 41 | M | 3 | Rifaximin, ciprofloxacin, loperamide, diphenoxylate/atropine, dicyclomine, probiotic, hydrocortisone suppository | Yes | Yes | No | No |
| Patient 18 | 67 | F | 33 | Amoxicillin clavulanate, ciprofloxacin, metronidazole, budesonide, VSL #3, diphenoxylate/atropine | No | Yes | No | No |

Supplemental Table 2: PDAI Component Scores and Adverse Events

|  | PDAI | | Symptom Subscore | | Endoscopy Subscore | | Histology Subscore | | Do you feel your symptoms have improved since FMT was performed? | Dose escalation or adverse event within one month |
| --- | --- | --- | --- | --- | --- | --- | --- | --- | --- | --- |
|  | Pre-FMT | 4 weeks  post-FMT | Pre-FMT | 4 weeks post-FMT | Pre-FMT | 4 weeks post-FMT | Pre-FMT | 4 weeks post-FMT |  |  |
| Patient 1 | 7 | 6 | 1 | 1 | 4 | 3 | 2 | 2 | No |  |
| Patient 2 | 5 |  | 2 | 1 | 3 |  | 0 |  | Yes |  |
| Patient 3 | 6 |  | 0 | 0 | 5 |  | 1 |  | Yes |  |
| Patient 4 | 6 | 4 | 1 | 1 | 4 | 3 | 1 | 0 | Yes |  |
| Patient 5 | 9 |  | 1 | 1 | 5 |  | 3 |  | No | Admitted with partial small bowel obstruction 8 days after FMT, though related to prior adhesions. Budesonide and ciprofloxacin started within one month after FMT. |
| Patient 6 | 6 | 5 | 3 | 2 | 3 | 2 | 0 | 1 | Yes |  |
| Patient 7 | 5 | 6 | 1 | 2 | 4 | 4 | 0 | 0 | Yes |  |
| Patient 8 | 5 |  | 2 | 1 | 3 |  | 0 |  | No |  |
| Patient 9 | 4 |  | 1 | 1 | 2 |  | 1 |  | No | Ciprofloxacin and metronidazole given for pouchitis within 1 month after FMT |
| Patient 10 | 7 | 6 | 3 | 1 | 3 | 3 | 1 | 2 | Yes |  |
| Patient 11 | 5 |  | 1 | 6 | 3 |  | 1 |  | No |  |
| Patient 12 | 9 | 10 | 3 | 2 | 4 | 6 | 2 | 2 | Yes |  |
| Patient 13 | 6 | 7 | 2 | 1 | 2 | 5 | 2 | 1 | No |  |
| Patient 14 | 6 |  | 2 | 3 | 3 |  | 1 |  | No | Increased symptoms after stopping amoxicillin/clavulanic acid prior to FMT. After FMT restarted amoxicillin/clavulanic acid and started adalimumab for pouchitis within one month |
| Patient 15 | 8 | 7 | 2 | 1 | 5 | 5 | 1 | 1 | No |  |
| Patient 16 | 5 | 2 | 4 | 1 | 0 | 0 | 1 | 1 | Yes |  |
| Patient 17 | 8 | 8 | 2 | 3 | 5 | 3 | 1 | 2 | Yes |  |
| Patient 18 | 8 | 9 | 4 | 3 | 3 | 3 | 1 | 3 | No | Repeated 5 days rifaximin within one month of FMT (before second FMT) |

Supplemental Table 3: Symptom Survey Responses

|  | Pain | | Number of Loose Bowel Movements Per Day | | Bleeding | | Urgency* | |
| --- | --- | --- | --- | --- | --- | --- | --- | --- |
|  | Pre-FMT | 4 weeks  post-FMT | Pre-FMT | 4 weeks post-FMT | Pre-FMT | 4 weeks post-FMT | Pre-FMT | 4 weeks post-FMT |
| Patient 1 | 2 | 1 | 7 | 7.5 | No | No | 1 | 1 |
| Patient 2 | 4 | 3 | 10 | 9 | No | No | 1 | 1 |
| Patient 3 | 0 | 0 | 5 | 3 | No | No | 0 | 0 |
| Patient 4 | 5 | 3 | 10 | 10 | No | No | 1 | 1 |
| Patient 5 | 3 | 4 | 3 | 0 | No | No | 1 | 1 |
| Patient 6 | 9 | 7.5 | 15 | 15 | Yes | No | 1 | 2 |
| Patient 7 | 7 | 0 | 4.5 | 6 | Yes | No | 1 | 1 |
| Patient 8 | 1 | 0 | 8 | 0 | Yes | No | 1 | 1 |
| Patient 9 | 3.5 | 3 | 7 | 7 | No | No | 1 | 1 |
| Patient 10 | 10 | 4 | 15 | 12 | No | No | 1 | 1 |
| Patient 11 | 6 | 6.5 | 0 | 12.5 | No | No | 1 | 2 |
| Patient 12 | 0 | 0 | 8.5 | 7 | Yes | No | 1 | 1 |
| Patient 13 | 5 | 4 | 6.5 | 6.5 | No | No | 2 | 1 |
| Patient 14 | 5 | 5 | 15 | 10 | No | Yes | 2 | 2 |
| Patient 15 | 8 | 8.5 | 10 | 9 | No | No | 2 | 1 |
| Patient 16 | 2 | 2 | 17.5 | 5 | No | No | 2 | 1 |
| Patient 17 | 5 | 2 | 11 | 6 | No | Yes | 2 | 1 |
| Patient 18 | 0 | 2 | 15 | 11 | No | No | 2 | 2 |

*Urgency scale options were none = 0, occasional =1, usual = 2.
